# Supplementary material for: Sirt6-mediated epigenetic modification of DNA accessibility is essential for Pou2f3-induced thymic tuft cell development
Source: PubMed Central journal article supplement (PMC9170729; doi:10.1038/s42003-022-03484-9), 2022-06-06
Supplement: 42003_2022_3484_MOESM2_ESM.pdf [file 42003_2022_3484_MOESM2_ESM.pdf]

## Description of Additional Supplementary Files

**File name:** Supplementary Data 1

**Description:** The source data behind the graphs in the Fig 1.

**File name:** Supplementary Data 2

**Description:** The source data behind the graphs in the Fig 2.

**File name:** Supplementary Data 3

**Description:** The source data behind the graphs in the Fig 3.

**File name:** Supplementary Data 4

**Description:** The genes regulated by Pou2f3.

**File name:** Supplementary Data 5

**Description:** The source data behind the graphs in the Fig 4.

**File name:** Supplementary Data 6

**Description:** The source data behind the graphs in the Fig 5.

**File name:** Supplementary Data 7

**Description:** The source data behind the graphs in the Fig 6.

**File name:** Supplementary Data 8

**Description:** Marker genes of mTEC subsets calculated by scATAC-seq.
